# Supplementary material for: Micro-Nano Bioactive Glass Particles Incorporated Porous Scaffold for Promoting Osteogenesis and Angiogenesis in vitro
Source: PubMed Central journal article supplement (PMC6449679; doi:10.3389/fchem.2019.00186), 2019-03-29
Supplement: Presentation_1.pdf [file Presentation_1.pdf]

## *Supplementary Material*

### **Micro-Nano Bioactive Glass Particles Incorporated Porous Scaffold for Promoting Osteogenesis and Angiogenesis *in vitro***

**Ting Tian**<sup>a, c, d</sup>, **Weihan Xie**<sup>b, c, d</sup>, **Wendong Gao**<sup>b, c, d</sup>, **Gang Wang**<sup>b, c, d</sup>, **Lei Zeng**<sup>b, c, d</sup>, **Guohou Miao**<sup>g</sup>, **Bo Lei**<sup>f\*</sup>, **Zhanyi Lin**<sup>a, e\*</sup>, **Xiaofeng Chen**<sup>b, c, d\*</sup>

**\* Correspondence:**

Prof. Bo Lei, E-mail: rayboo@xjtu.edu.cn

Prof. Zhanyi Lin, E-mail: linzhanyi@hotmail.com

Prof. Xiaofeng Chen, E-mail: chenxf@scut.edu.cn

#### **1 Supplementary Figure**

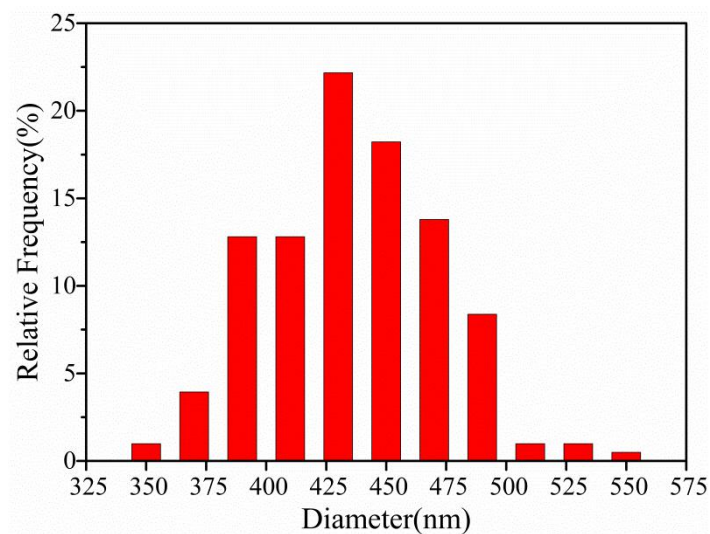

**Fig. S1** Particles diameter distribution of micro-nano bioactive glass (MNBG).

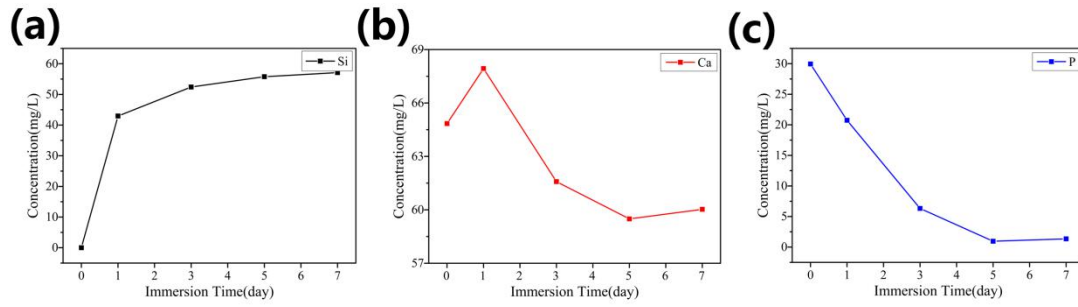

**Fig. S2** Bioactive ions release curves of MNBG for (a) Si; (b) Ca; (c) P.

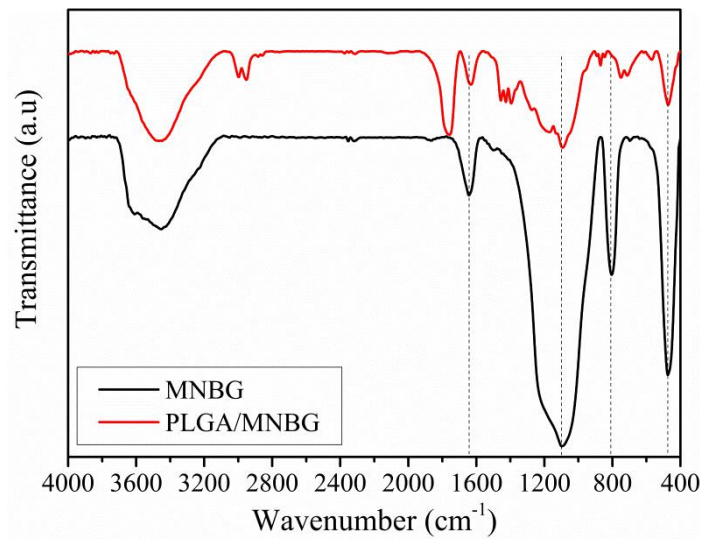

**Fig. S3** FTIR spectra of MNBG and PLGA-MNBG.

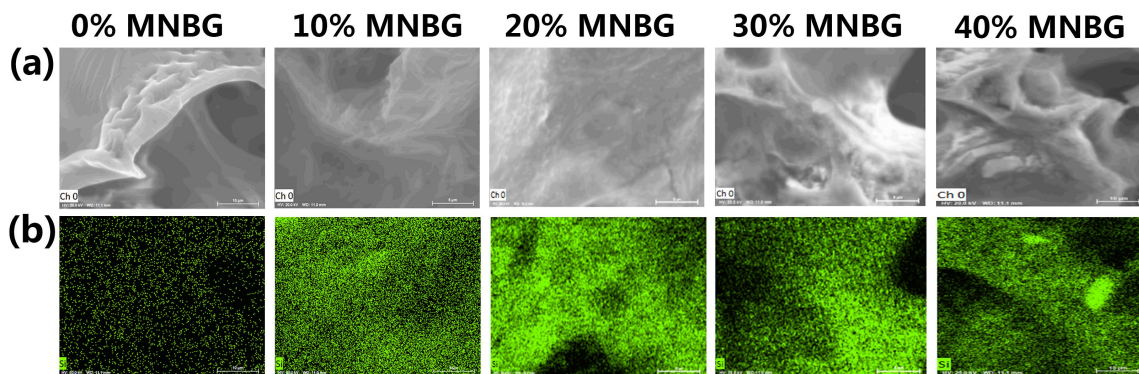

**Fig. S4** EDS mapping of PLGA-MNBG scaffolds.(a)The SEM image of the scaffold and (b)Si distribution of the MNBG in the scaffold.
